# Supplementary material
Source: PubMed Central journal article supplement (PMC11378974)
Supplement: NIHMS1966983-supplement-Supplemental_Materials.pdf [file NIHMS1966983-supplement-Supplemental_Materials.pdf]

**Online Table 1: Factor Loadings for Ninth Grader's School Misbehavior per Adolescents and their Parents**  
(alpha=0.71)

|                                                                                                                                                                                     | Factor 1 |
|-------------------------------------------------------------------------------------------------------------------------------------------------------------------------------------|----------|
| Adolescent Wave 1 report of Times in class without books/reading material in last 6 months of school<br><i>(0=Never, 1=1-2 times, 2=3-6 times, 3=7-9 times, 4=10 or more times)</i> | 0.47     |
| Adolescent Wave 1 report of How often 9th grader goes to class without their homework done<br><i>(0=Never, 1=Rarely, 2=Sometimes, 3=Often)</i>                                      | 0.49     |
| Adolescent Wave 1 report of How often 9th grader goes to class late<br><i>(0=Never, 1=Rarely, 2=Sometimes, 3=Often)</i>                                                             | 0.45     |
| Adolescent Wave 1 report of How often 9th grader goes to class without pencil or paper<br><i>(0=Never, 1=Rarely, 2=Sometimes, 3=Often)</i>                                          | 0.47     |
| Parent Wave 1 report of how often contacted by school about problem behavior<br><i>(0=Never, 1=Once or twice, 2=Three or four times, 3=More than four times)</i>                    | 0.62     |
| Parent Wave 1 report of How often parent contacted by school about poor attendance<br><i>(0=Never, 1=Once or twice, 2=Three or four times, 3=More than four times)</i>              | 0.43     |
| Parent Wave 1 report of how often contacted by school about poor performance<br><i>(0=Never, 1=Once or twice, 2=Three or four times, 3=More than four times)</i>                    | 0.53     |
| Parent Wave 1 report of Whether 9th grader has ever been suspended or expelled<br><i>(0=No, 3=Yes)</i>                                                                              | 0.47     |

Source: US Department of Education, National Center for Education Statistics, "The High School Longitudinal Study of 2009" 2009.

**Online Table 2: Factor Loadings for Scales Describing Negative Experiences**

| <b>Negative Experiences with Teachers per Ninth Graders (alpha=0.76)</b>                                                                                                                                |  | Factor 1 |
|---------------------------------------------------------------------------------------------------------------------------------------------------------------------------------------------------------|--|----------|
| <i>How much do you agree or disagree with the following statements about [your math teacher]? Remember, none of your teachers or your principal will see any of the answers you provide.</i>            |  |          |
| 9th grader's fall 2009 math teacher treats students with respect<br>(1=Strongly agree, 2=Agree, 3=Disagree, 4=Strongly disagree)                                                                        |  | 0.67     |
| 9th grader's fall 2009 science teacher treats students with respect<br>(1=Strongly agree, 2=Agree, 3=Disagree, 4=Strongly disagree)                                                                     |  | 0.66     |
| 9th grader's fall 2009 math teacher treats every student fairly<br>(1=Strongly agree, 2=Agree, 3=Disagree, 4=Strongly disagree)                                                                         |  | 0.70     |
| 9th grader's fall 2009 science teacher treats every student fairly<br>(1=Strongly agree, 2=Agree, 3=Disagree, 4=Strongly disagree)                                                                      |  | 0.70     |
| 9th grader's fall 2009 math teacher treats some kids better than others<br>(1=Strongly disagree, 2=Disagree, 3=Agree, 4=Strongly agree)                                                                 |  | 0.50     |
| 9th grader's fall 2009 science teacher treats some kids better than others<br>(1=Strongly disagree, 2=Disagree, 3=Agree, 4=Strongly agree)                                                              |  | 0.50     |
| <b>Negative Peer Climate per School Administrator (alpha=0.89)</b>                                                                                                                                      |  | Factor 1 |
| <i>To the best of your knowledge how often do the following types of problems occur at your high school? (1=Never happens, 2=On occasion, 3=At least once a month, 4=At least once a week, 5=Daily)</i> |  |          |
| Physical conflicts among students                                                                                                                                                                       |  | 0.67     |
| Robbery or theft                                                                                                                                                                                        |  | 0.62     |
| Student use of illegal drugs while at school                                                                                                                                                            |  | 0.71     |
| Frequency of students use of alcohol while at school                                                                                                                                                    |  | 0.65     |
| The sale of drugs on the way to or from school or on school grounds                                                                                                                                     |  | 0.69     |
| Frequency of student possession of weapons at this school                                                                                                                                               |  | 0.56     |
| Vandalism                                                                                                                                                                                               |  | 0.64     |
| Physical abuse of teachers                                                                                                                                                                              |  | 0.41     |
| Student verbal abuse of teachers                                                                                                                                                                        |  | 0.69     |
| Student in-class misbehavior                                                                                                                                                                            |  | 0.64     |
| Student acts of disrespect for teachers                                                                                                                                                                 |  | 0.69     |
| Student gang activities                                                                                                                                                                                 |  | 0.64     |
| Student racial tension                                                                                                                                                                                  |  | 0.48     |
| Student bullying                                                                                                                                                                                        |  | 0.58     |

Source: US Department of Education, National Center for Education Statistics, "The High School Longitudinal Study of 2009" 2009.

**Online Table 3: Explaining Racial Differences in Ninth Grade Boys' School Misbehavior (RQ2) - Coefficients from Linear Regression Models with Standard Errors Clustered at the School Level**

|                                                      | Model 1  |        | Model 2   |        | Model 3   |        | Model 4  |        | Model 5  |        |
|------------------------------------------------------|----------|--------|-----------|--------|-----------|--------|----------|--------|----------|--------|
|                                                      | B        | (SE)   | B         | (SE)   | B         | (SE)   | B        | (SE)   | B        | (SE)   |
| <b>Adolescent's Race (ref=White):</b>                |          |        |           |        |           |        |          |        |          |        |
| Black                                                | 0.40 *** | (0.06) | 0.36 ***  | (0.06) | 0.31 ***  | (0.06) | 0.31 *** | (0.06) | 0.02     | (0.06) |
| Latinx                                               | 0.30 *** | (0.04) | 0.25 ***  | (0.04) | 0.18 ***  | (0.04) | 0.18 *** | (0.04) | 0.00     | (0.04) |
| Asian                                                | -0.17 ** | (0.06) | -0.20 *** | (0.05) | -0.22 **  | (0.07) | -0.22 ** | (0.07) | 0.06     | (0.06) |
| <b>Contextual Contributors to School Misbehavior</b> |          |        |           |        |           |        |          |        |          |        |
| Region (ref=Midwest):                                |          |        |           |        |           |        |          |        |          |        |
| Northeast                                            |          |        | -0.06     | (0.05) | -0.05     | (0.05) | -0.04    | (0.05) | 0.00     | (0.05) |
| South                                                |          |        | 0.04      | (0.05) | 0.04      | (0.05) | 0.05     | (0.05) | 0.05     | (0.04) |
| West                                                 |          |        | 0.05      | (0.06) | 0.06      | (0.05) | 0.04     | (0.06) | -0.01    | (0.05) |
| Urbanicity (ref=Suburban):                           |          |        |           |        |           |        |          |        |          |        |
| City                                                 |          |        | 0.03      | (0.05) | -0.03     | (0.05) | -0.03    | (0.05) | 0.01     | (0.04) |
| Town                                                 |          |        | 0.01      | (0.05) | -0.07     | (0.05) | -0.07    | (0.05) | -0.11 *  | (0.05) |
| Rural                                                |          |        | -0.04     | (0.04) | -0.08 *   | (0.04) | -0.06    | (0.04) | -0.05    | (0.04) |
| School type (ref=Public):                            |          |        |           |        |           |        |          |        |          |        |
| Catholic                                             |          |        | -0.42 *** | (0.05) | -0.26 *** | (0.06) | -0.19 ** | (0.07) | -0.16 ** | (0.05) |
| Other private                                        |          |        | -0.27 *** | (0.05) | -0.12 *   | (0.05) | -0.03    | (0.06) | 0.02     | (0.07) |
| Percent students eligible for free or reduced lunch  |          |        |           |        | 0.01 ***  | (0.00) | 0.01 *** | (0.00) | 0.00     | (0.00) |
| Percent student Black                                |          |        |           |        | 0.00      | (0.00) | 0.00     | (0.00) | 0.00     | (0.00) |
| Percent students Latinx                              |          |        |           |        | 0.00      | (0.00) | 0.00     | (0.00) | 0.00     | (0.00) |
| Percent students Asian                               |          |        |           |        | 0.00      | (0.00) | 0.00     | (0.00) | 0.00     | (0.00) |
| Negative peer climate per school administrator       |          |        |           |        |           |        | 0.06 *   | (0.02) | 0.02     | (0.02) |
| <b>Adolescents' Negative Experiences</b>             |          |        |           |        |           |        |          |        |          |        |
| Negative experiences with 9th math course placement  |          |        |           |        |           |        |          |        | 0.02     | (0.02) |
| Negative experiences with achievement                |          |        |           |        |           |        |          |        | 0.51 *** | (0.02) |
| Negative experiences with teachers                   |          |        |           |        |           |        |          |        | 0.14 *** | (0.01) |
| Constant                                             | 0.12 *** | (0.02) | 0.14 **   | (0.04) | 0.01      | (0.05) | 0.00     | (0.05) | 0.13 **  | (0.04) |

Source: US Department of Education, National Center for Education Statistics, "The High School Longitudinal Study of 2009" 2009.

\*\*\*p<0.001, \*\*p<0.01, \*p<0.05.

**Online Table 4: Explaining Racial Differences in Ninth Grade Girls' School Misbehavior (RQ2) - Coefficients from Linear Regression Models with Standard Errors Clustered at the School Level**

|                                                      | Model 1   |        | Model 2   |        | Model 3   |        | Model 4   |        | Model 5   |        |
|------------------------------------------------------|-----------|--------|-----------|--------|-----------|--------|-----------|--------|-----------|--------|
|                                                      | B         | (SE)   |
| <b>Adolescent's Race (ref=White):</b>                |           |        |           |        |           |        |           |        |           |        |
| Black                                                | 0.32 ***  | (0.04) | 0.27 ***  | (0.04) | 0.16 ***  | (0.04) | 0.16 ***  | (0.04) | -0.02     | (0.04) |
| Latinx                                               | 0.37 ***  | (0.04) | 0.33 ***  | (0.04) | 0.27 ***  | (0.04) | 0.27 ***  | (0.04) | 0.08 *    | (0.04) |
| Asian                                                | -0.08     | (0.08) | -0.11     | (0.07) | -0.07     | (0.08) | -0.07     | (0.08) | 0.13 +    | (0.07) |
| <b>Contextual Contributors to School Misbehavior</b> |           |        |           |        |           |        |           |        |           |        |
| Region (ref=Midwest):                                |           |        |           |        |           |        |           |        |           |        |
| Northeast                                            |           |        | -0.08     | (0.05) | -0.07     | (0.05) | -0.06     | (0.05) | -0.10 *   | (0.04) |
| South                                                |           |        | -0.01     | (0.04) | -0.02     | (0.03) | -0.02     | (0.03) | -0.01     | (0.03) |
| West                                                 |           |        | 0.00      | (0.05) | 0.05      | (0.05) | 0.04      | (0.05) | -0.01     | (0.04) |
| Urbanicity (ref=Suburban):                           |           |        |           |        |           |        |           |        |           |        |
| City                                                 |           |        | 0.09 *    | (0.04) | 0.04      | (0.04) | 0.04      | (0.04) | 0.04      | (0.03) |
| Town                                                 |           |        | 0.08      | (0.05) | 0.01      | (0.05) | 0.01      | (0.05) | 0.00      | (0.04) |
| Rural                                                |           |        | -0.05     | (0.04) | -0.07 *   | (0.04) | -0.06     | (0.04) | -0.06     | (0.03) |
| School type (ref=Public):                            |           |        |           |        |           |        |           |        |           |        |
| Catholic                                             |           |        | -0.46 *** | (0.05) | -0.27 *** | (0.05) | -0.19 *** | (0.05) | -0.19 *** | (0.05) |
| Other private                                        |           |        | -0.21 *** | (0.06) | -0.03     | (0.06) | 0.05      | (0.07) | 0.05      | (0.06) |
| Percent students eligible for free or reduced lunch  |           |        |           |        | 0.01 ***  | (0.00) | 0.01 ***  | (0.00) | 0.00      | (0.00) |
| Percent student Black                                |           |        |           |        | 0.00      | (0.00) | 0.00      | (0.00) | 0.00      | (0.00) |
| Percent students Latinx                              |           |        |           |        | 0.00      | (0.00) | 0.00      | (0.00) | 0.00      | (0.00) |
| Percent students Asian                               |           |        |           |        | 0.00      | (0.00) | 0.00      | (0.00) | 0.00      | (0.00) |
| Negative peer climate per school administrator       |           |        |           |        |           |        | 0.05 *    | (0.02) | 0.02      | (0.02) |
| <b>Adolescents' Negative Experiences</b>             |           |        |           |        |           |        |           |        |           |        |
| Negative experiences with 9th math course placement  |           |        |           |        |           |        |           |        | 0.04 *    | (0.02) |
| Negative experiences with achievement                |           |        |           |        |           |        |           |        | 0.44 ***  | (0.02) |
| Negative experiences with teachers                   |           |        |           |        |           |        |           |        | 0.11 ***  | (0.01) |
| Constant                                             | -0.25 *** | (0.02) | -0.21 *** | (0.04) | -0.36 *** | (0.04) | -0.37 *** | (0.04) | -0.15 *** | (0.04) |

Source: US Department of Education, National Center for Education Statistics, "The High School Longitudinal Study of 2009" 2009.

\*\*\*p<0.001, \*\*p<0.01, \*p<0.05.
